# Supplementary material for: Environmental Enrichment Engages Vesicular Zinc Signaling to Enhance Hippocampal Neurogenesis
Source: MDPI journal article supplement (doi:10.3390/cells12060883), 2023-03-13
Supplement: s1 [file s1]

# SUPPLEMENTAL TABLES

**Supplementary Table S1.** Two-way ANOVA statistical results (effects of genotype and housing condition).

| <b>Cell Proliferation</b>         | <i>df</i> | <i>F</i> | <i>p</i>          |
|-----------------------------------|-----------|----------|-------------------|
| Genotype                          | 1, 20     | 12.51    | <b>.002*</b>      |
| Housing                           | 1, 20     | 15.18    | <b>&lt; .001*</b> |
| Genotype × Housing                | 1, 20     | 12.31    | <b>.002*</b>      |
| <b>Cell Survival</b>              | <i>df</i> | <i>F</i> | <i>p</i>          |
| Genotype                          | 1, 19     | 22.54    | <b>&lt; .001*</b> |
| Housing                           | 1, 19     | 31.02    | <b>&lt; .001*</b> |
| Genotype × Housing                | 1, 19     | 17.71    | <b>&lt; .001*</b> |
| <b>Neuronal Differentiation</b>   | <i>df</i> | <i>F</i> | <i>p</i>          |
| Genotype                          | 1, 19     | .013     | .910              |
| Housing                           | 1, 19     | 92.45    | <b>&lt; .001*</b> |
| Genotype × Housing                | 1, 19     | 0.29     | .596              |
| <b>Cell Death</b>                 | <i>df</i> | <i>F</i> | <i>p</i>          |
| Genotype                          | 1, 19     | 48.97    | <b>&lt; .001*</b> |
| Housing                           | 1, 19     | 71.12    | <b>&lt; .001*</b> |
| Genotype × Housing                | 1, 19     | 30.94    | <b>&lt; .001*</b> |
| <b>Granule Cell Layer Volume</b>  | <i>df</i> | <i>F</i> | <i>p</i>          |
| Genotype                          | 1, 19     | 22.78    | <b>&lt; .001*</b> |
| Housing                           | 1, 19     | 17.84    | <b>&lt; .001*</b> |
| Genotype × Housing                | 1, 19     | 19.72    | <b>&lt; .001*</b> |
| <b>Spatial Object Recognition</b> | <i>df</i> | <i>F</i> | <i>p</i>          |
| Genotype                          | 1, 35     | 6.96     | <b>.012*</b>      |
| Housing                           | 1, 35     | 8.72     | <b>.006*</b>      |
| Genotype × Housing                | 1, 35     | 7.12     | <b>.011*</b>      |
| <b>BDNF</b>                       | <i>df</i> | <i>F</i> | <i>p</i>          |
| Genotype                          | 1, 28     | 7.77     | <b>.009*</b>      |
| Housing                           | 1, 28     | 9.08     | <b>.005*</b>      |
| Genotype × Housing                | 1, 28     | 5.28     | <b>.029*</b>      |

Note. *df* = degrees of freedom. \**p* < .05.

**Supplementary Table S2.** Three-way repeated measures ANOVA statistical results (effects of genotype, housing condition, and day) of escape latency in the Morris Water Task.

|                                    | <i>df</i> | <i>F</i> | <i>p</i> |
|------------------------------------|-----------|----------|----------|
| Day                                | 2, 70     | 29.16    | < .001*  |
| Genotype                           | 1, 35     | 1.99     | .167     |
| Housing Condition                  | 1, 35     | 6.23     | .017*    |
| Day × Genotype                     | 2, 70     | 0.93     | .400     |
| Day × Housing Condition            | 2, 70     | 1.98     | .146     |
| Genotype × Housing Condition       | 1, 35     | 12.18    | .001*    |
| Day × Genotype × Housing Condition | 2, 70     | 0.28     | .754     |

*Note.* *df* = degrees of freedom. \**p* < .05.

**Supplementary Table S3.** Levene's test of homogeneity of variance for two-way ANOVAs (effects of genotype and housing condition).

|                            | <i>df</i> | Statistic | <i>p</i> |
|----------------------------|-----------|-----------|----------|
| Cell Proliferation         | 3, 20     | 1.03      | .403     |
| Cell Survival              | 3, 19     | 1.54      | .236     |
| Neuronal Differentiation   | 3, 19     | 2.55      | .086     |
| Cell Death                 | 3, 19     | 0.31      | .821     |
| Granule Cell Layer Volume  | 3, 19     | 0.39      | .764     |
| Spatial Object Recognition | 3, 35     | 0.44      | .728     |
| BDNF                       | 3, 28     | 0.06      | .981     |

*Note.* Results are based on mean. *df*= degrees of freedom. \**p* < .05.

**Supplementary Table S4.** Mauchly's test of sphericity and Levene's test of homogeneity of variance for three-way repeated measures ANOVA (effects of genotype, housing condition, and day).

| <b>Mauchly's Test</b>     | <i>df</i> | Mauchly's <i>W</i> | <i>p</i> |
|---------------------------|-----------|--------------------|----------|
| Day                       | 2, 70     | .98                | .661     |
| <b>Levene's Test</b>      | <i>df</i> | Statistic          | <i>p</i> |
| Morris Water Task – Day 1 | 3, 35     | 1.38               | .264     |
| Morris Water Task – Day 2 | 3, 35     | 1.21               | .322     |
| Morris Water Task – Day 3 | 3, 35     | 1.79               | .166     |

*Note.* Results are based on mean. *df*= degrees of freedom. \**p* < .05.

**Supplementary Table S5.** Levene's test of homogeneity of variance for independent samples t-tests (effect of treatment) separated by genotype.

| <b>WT</b>                   | Statistic | Significance | <i>t</i> | <i>df</i> | <i>p</i>     |
|-----------------------------|-----------|--------------|----------|-----------|--------------|
| Equal variances assumed     | 0.14      | .710         | 2.33     | 14        | <b>.018*</b> |
| Equal variances not assumed |           |              | 2.33     | 13.70     | .018*        |
| <b>ZnT3 KO</b>              | Statistic | Significance | <i>t</i> | <i>df</i> | <i>p</i>     |
| Equal variances assumed     | 3.52      | .088         | 2.19     | 11        | <b>.025*</b> |
| Equal variances not assumed |           |              | 2.28     | 9.92      | .023*        |

*Note.* Results are based on mean. *df*= degrees of freedom. \**p* < .05. When the assumption of homogeneity of variances was not met (**significance** < .05), the *t*, *df*, and *p* values from the "equal variances not assumed row" was used.

**Supplementary Table S6.** Additional statistical data for all statistical analyses. Statistics are reported as mean  $\pm$  standard error of the mean.

|                                                                                 | WT-SH                           | WT-EE                           | ZnT3 KO-SH                      | ZnT3 KO-EE                      |
|---------------------------------------------------------------------------------|---------------------------------|---------------------------------|---------------------------------|---------------------------------|
| Cell Proliferation                                                              | 4016.00 $\pm$ 105.48<br>(n = 6) | 5067.00 $\pm$ 182.26<br>(n = 6) | 4012.00 $\pm$ 139.67<br>(n = 6) | 4067.00 $\pm$ 129.45<br>(n = 6) |
| Cell Survival                                                                   | 852.00 $\pm$ 43.90<br>(n = 6)   | 1722.00 $\pm$ 113.73<br>(n = 6) | 804.00 $\pm$ 60.14<br>(n = 6)   | 925.20 $\pm$ 123.54<br>(n = 5)  |
| Neuronal Differentiation<br>(% of BrdU-positive cells<br>co-labelled with NeuN) | 65.34 $\pm$ 4.42<br>(n = 6)     | 92.36 $\pm$ 1.23<br>(n = 6)     | 63.40 $\pm$ 3.16<br>(n = 6)     | 93.63 $\pm$ 1.25<br>(n = 5)     |
| Cell Death                                                                      | 488.00 $\pm$ 10.70<br>(n = 6)   | 293.00 $\pm$ 12.81<br>(n = 6)   | 508.00 $\pm$ 12.17<br>(n = 6)   | 468.00 $\pm$ 20.35<br>(n = 5)   |
| Granule Cell Layer Volume<br>(mm <sup>3</sup> )                                 | 1.02 $\pm$ 0.03<br>(n = 6)      | 1.33 $\pm$ 0.04<br>(n = 6)      | 1.00 $\pm$ 0.04<br>(n = 6)      | 0.99 $\pm$ 0.05<br>(n = 5)      |
| Spatial Object Recognition<br>(Investigation ratio; %)                          | 49.83 $\pm$ 2.61<br>(n = 10)    | 66.08 $\pm$ 3.30<br>(n = 9)     | 49.94 $\pm$ 2.51<br>(n = 10)    | 50.74 $\pm$ 3.13<br>(n = 10)    |
| Morris Water Task – Day 1<br>(Escape latency; s)                                | 40.11 $\pm$ 3.27<br>(n = 10)    | 29.21 $\pm$ 4.23<br>(n = 9)     | 37.65 $\pm$ 3.38<br>(n = 10)    | 44.65 $\pm$ 2.69<br>(n = 10)    |
| Morris Water Task – Day 2<br>(Escape latency; s)                                | 36.91 $\pm$ 2.90<br>(n = 10)    | 17.04 $\pm$ 2.73<br>(n = 9)     | 30.96 $\pm$ 3.13<br>(n = 10)    | 29.05 $\pm$ 4.09<br>(n = 10)    |
| Morris Water Task – Day 3<br>(Escape latency; s)                                | 25.07 $\pm$ 4.81<br>(n = 10)    | 14.93 $\pm$ 4.85<br>(n = 9)     | 19.28 $\pm$ 2.04<br>(n = 10)    | 20.98 $\pm$ 3.29<br>(n = 10)    |
| BDNF Levels<br>(pg/mg total protein)                                            | 314.66 $\pm$ 25.56<br>(n = 8)   | 455.86 $\pm$ 27.06<br>(n = 8)   | 301.66 $\pm$ 26.33<br>(n = 7)   | 320.67 $\pm$ 26.44<br>(n = 9)   |
|                                                                                 | WT                              | WT-Zn                           | ZnT3 KO                         | ZnT3 KO-Zn                      |
| Percent Change in BDNF<br>(from control; %)                                     | 100.00 $\pm$ 7.76<br>(n = 8)    | 125.93 $\pm$ 9.01<br>(n = 8)    | 100.00 $\pm$ 4.58<br>(n = 6)    | 119.41 $\pm$ 7.16<br>(n = 7)    |
